# Supplementary material for: First example of a molecular Ce(iii) phosphonate: synthesis, structural characterization and catalytic activity of [Ce2{Ph3CPO2(OEt)}4(NO3)2(H2O)4], structural diversity of Ph3CPO3H2
Source: Royal Society of Chemistry journal article supplement (doi:10.1039/b807801g), 2008-01-01

Electronic Supplementary Information for *Dalton Transactions*  
This journal is © The Royal Society of Chemistry 2008

**Electronic Supporting Information**

**First Example of a Molecular Ce(III) Phosphonate. Synthesis,  
Structural Characterization and Catalytic activity of  
[Ce<sub>2</sub>{Ph<sub>3</sub>CPO<sub>2</sub>(OEt)}<sub>4</sub>(NO<sub>3</sub>)<sub>2</sub>(H<sub>2</sub>O)<sub>4</sub>]. Structural Diversity of  
Ph<sub>3</sub>CPO<sub>3</sub>H<sub>2</sub>**

**Vadapalli Chandrasekhar\*\*<sup>a</sup> and Palani Sasikumar<sup>a</sup>**  
e-mail: [vc@iitk.ac.in](mailto:vc@iitk.ac.in)

Department of Chemistry, Indian Institute of Technology Kanpur, Kanpur-208 016, India.  
Tel: 91-512-2597259, Fax: 91-512-2590007/2597436. e-mail: [vc@iitk.ac.in](mailto:vc@iitk.ac.in)

Figure S1(a). Asymmetric unit of **1a**

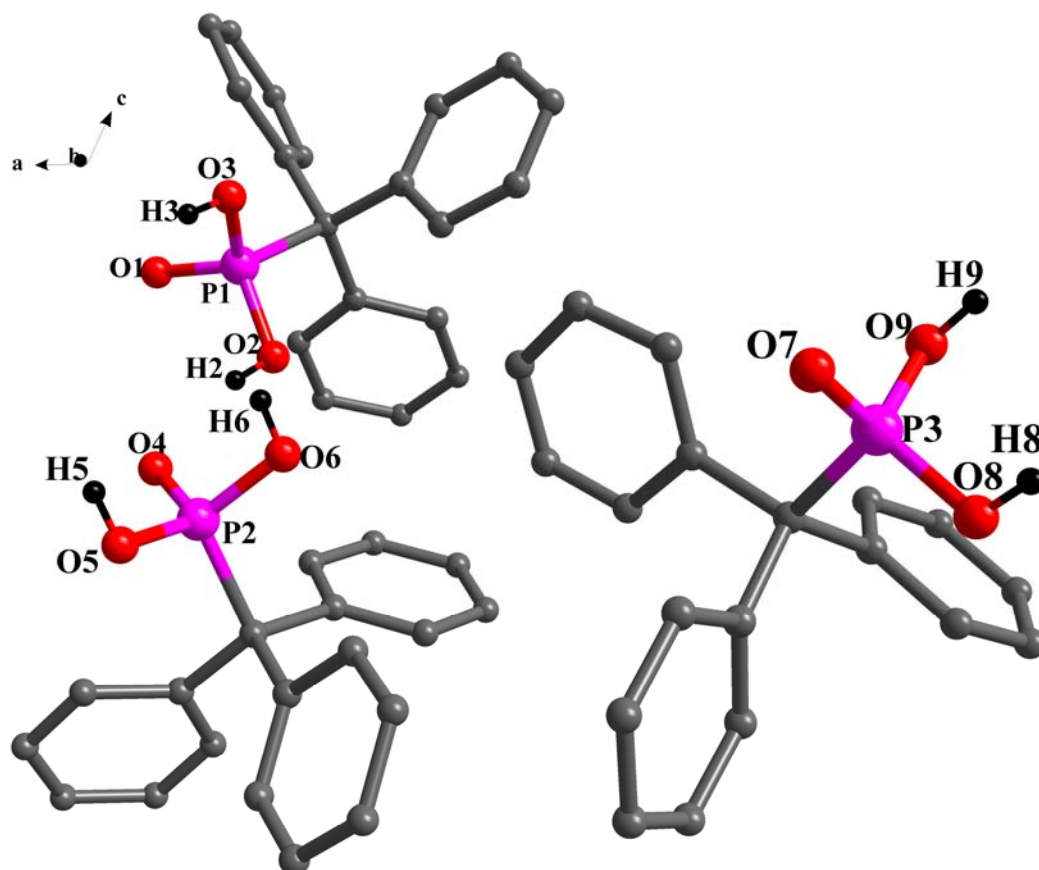

Figure S1(b). Asymmetric unit of **1b**

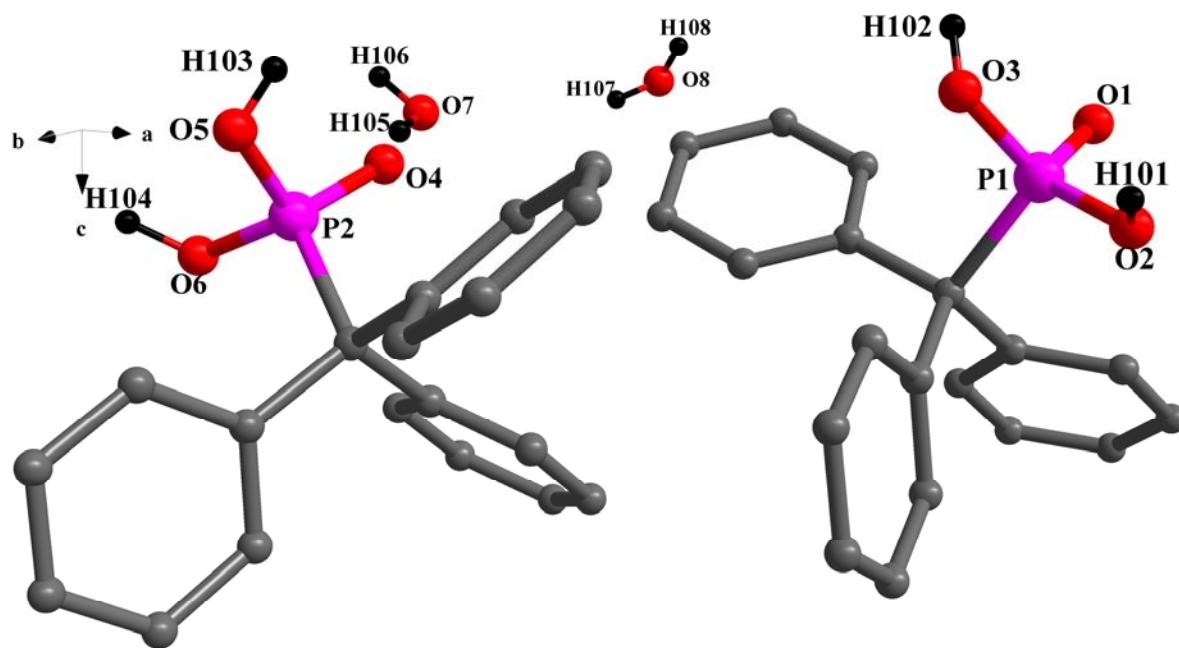

Figure S1(c). Asymmetric unit of **1c**

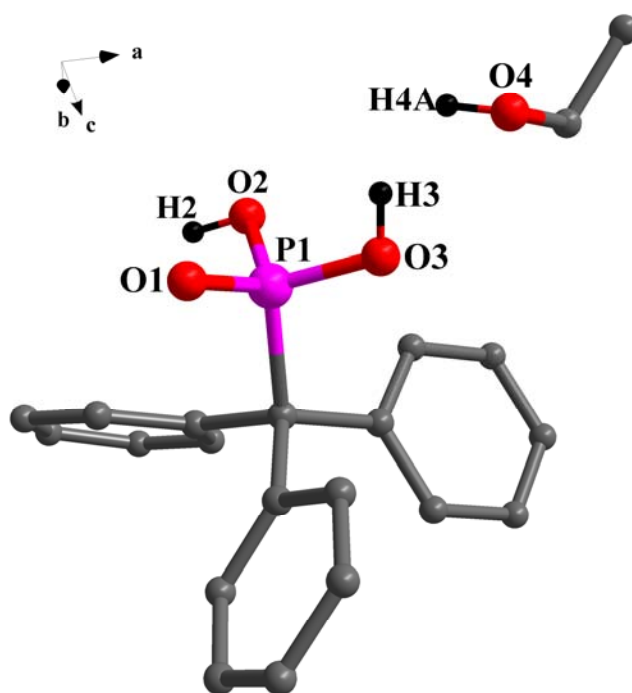

**Figure S2(a).** ESI-MS of **2**

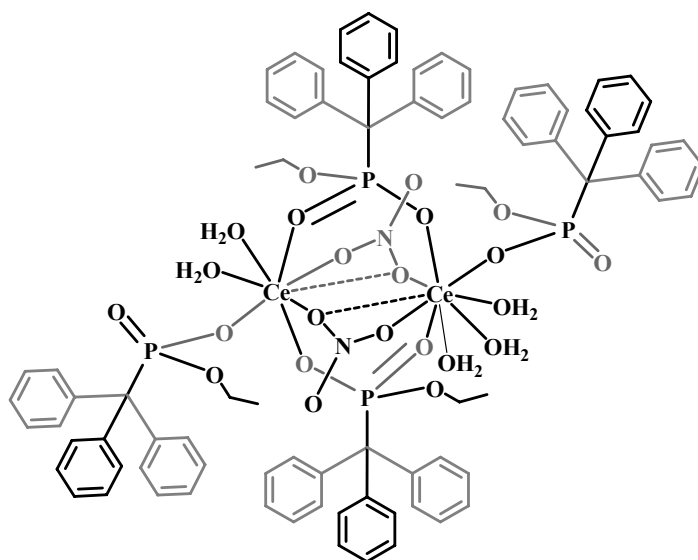

Formula:  $C_{84}H_{91}Ce_2N_2O_{23}P_4$  (Calculated from Sheffield chemputer)

| mass | %     |
|------|-------|
| 1895 | 0.4   |
| 1896 | 0.4   |
| 1897 | 0.8   |
| 1898 | 0.6   |
| 1899 | 100.0 |
| 1900 | 93.1  |
| 1901 | 72.6  |
| 1902 | 40.9  |
| 1903 | 18.5  |
| 1904 | 7.1   |
| 1905 | 2.2   |
| 1906 | 0.6   |
| 1907 | 0.1   |
| 1908 | 0.0   |

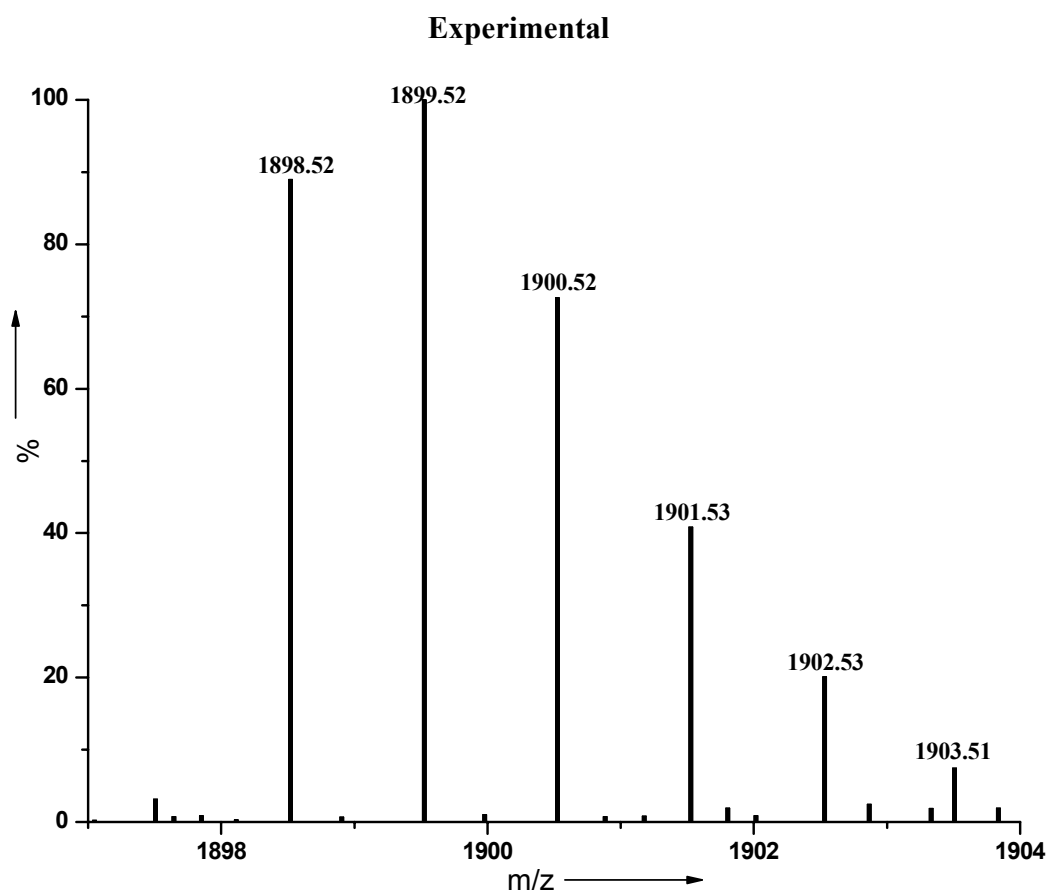

**Figure S2(b).** ESI-MS of **2** of fragment species

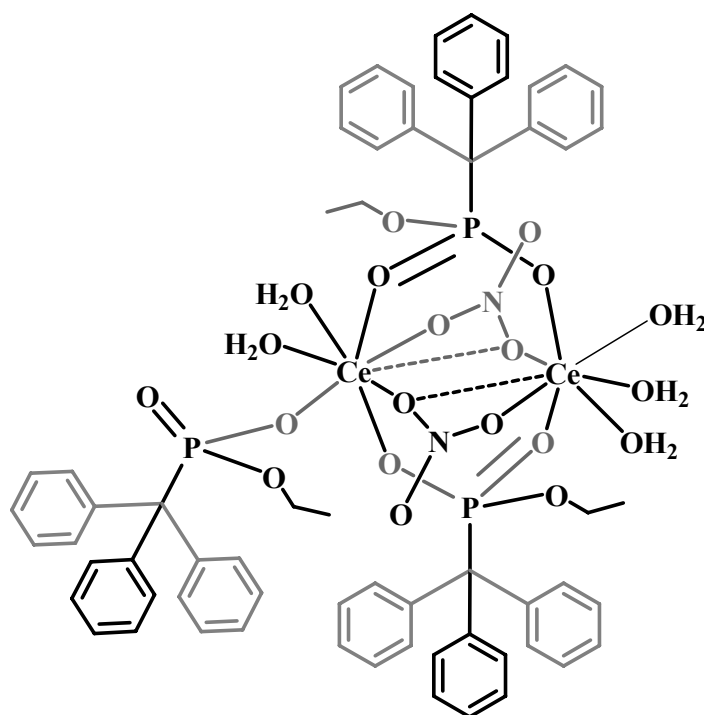

Formula: C<sub>63</sub>H<sub>70</sub>Ce<sub>2</sub>N<sub>2</sub>O<sub>20</sub>P<sub>3</sub> (Calculated from Sheffield chemputer)

| mass | %     |
|------|-------|
| 1543 | 0.4   |
| 1544 | 0.3   |
| 1545 | 0.7   |
| 1546 | 0.5   |
| 1547 | 100.0 |
| 1548 | 70.2  |
| 1549 | 53.5  |
| 1550 | 26.0  |
| 1551 | 10.7  |
| 1552 | 3.6   |
| 1553 | 1.0   |
| 1554 | 0.2   |
| 1555 | 0.1   |
| 1556 | 0.0   |

**Experimental**

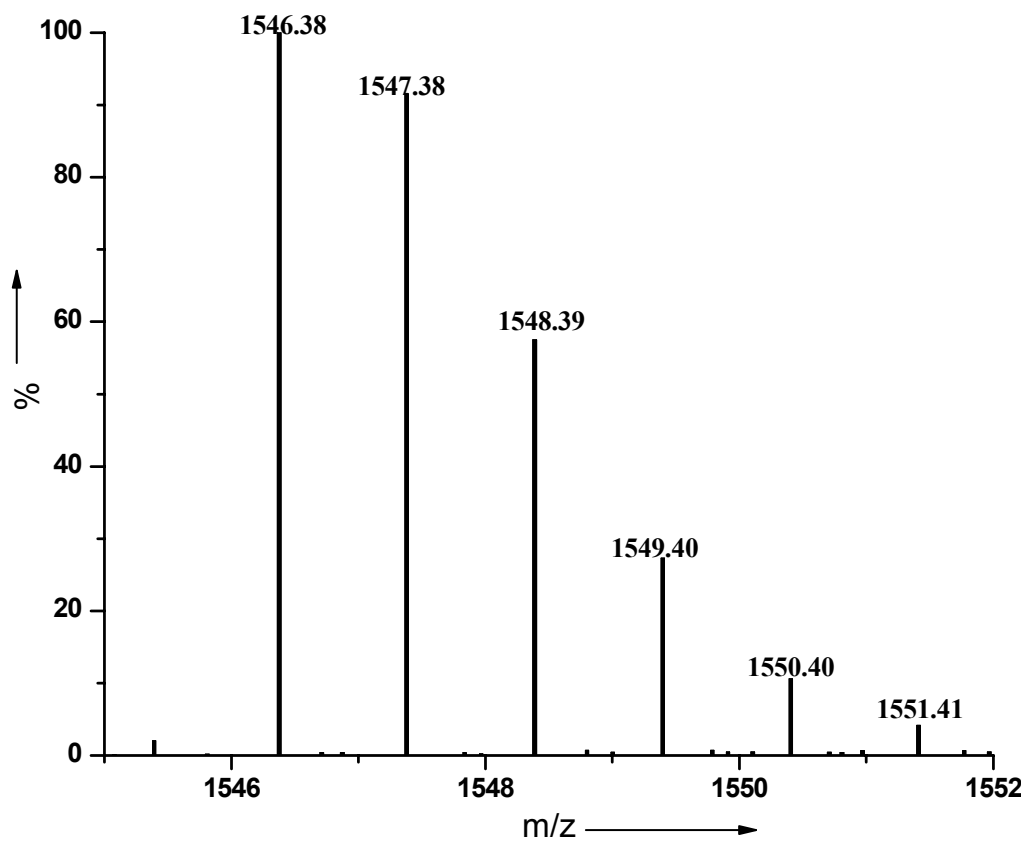



**Figure S2(c).** ESI-MS of **2** of fragment species

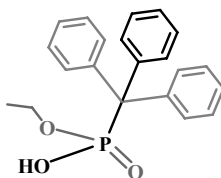

Formula: C<sub>21</sub>H<sub>22</sub>O<sub>3</sub>P<sub>1</sub> (Calculated from Sheffield chemputer)

| mass | %     |
|------|-------|
| 353  | 100.0 |
| 354  | 23.0  |
| 355  | 3.2   |
| 356  | 0.3   |
| 357  | 0.0   |

**Experimental**

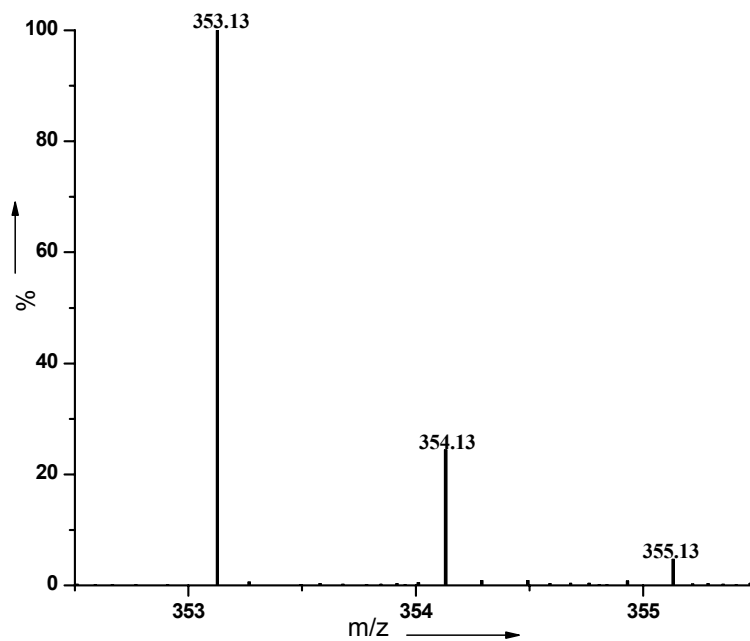

Figures S3-S5. ESI-MS of 3-5

| Compound                                                                                   | (Calculated from Sheffield chemputer), M+H amu                         |
|--------------------------------------------------------------------------------------------|------------------------------------------------------------------------|
| 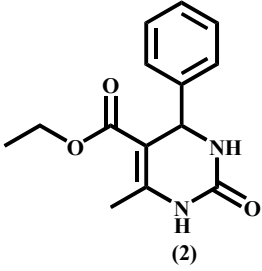<br>(2) | Formula: C <sub>14</sub> H <sub>17</sub> N <sub>2</sub> O <sub>3</sub> |
| mass %                                                                                     |                                                                        |
| 261                                                                                        | 100.0                                                                  |
| 262                                                                                        | 16.2                                                                   |
| 263                                                                                        | 1.9                                                                    |
| 264                                                                                        | 0.2                                                                    |
| 265                                                                                        | 0.0                                                                    |

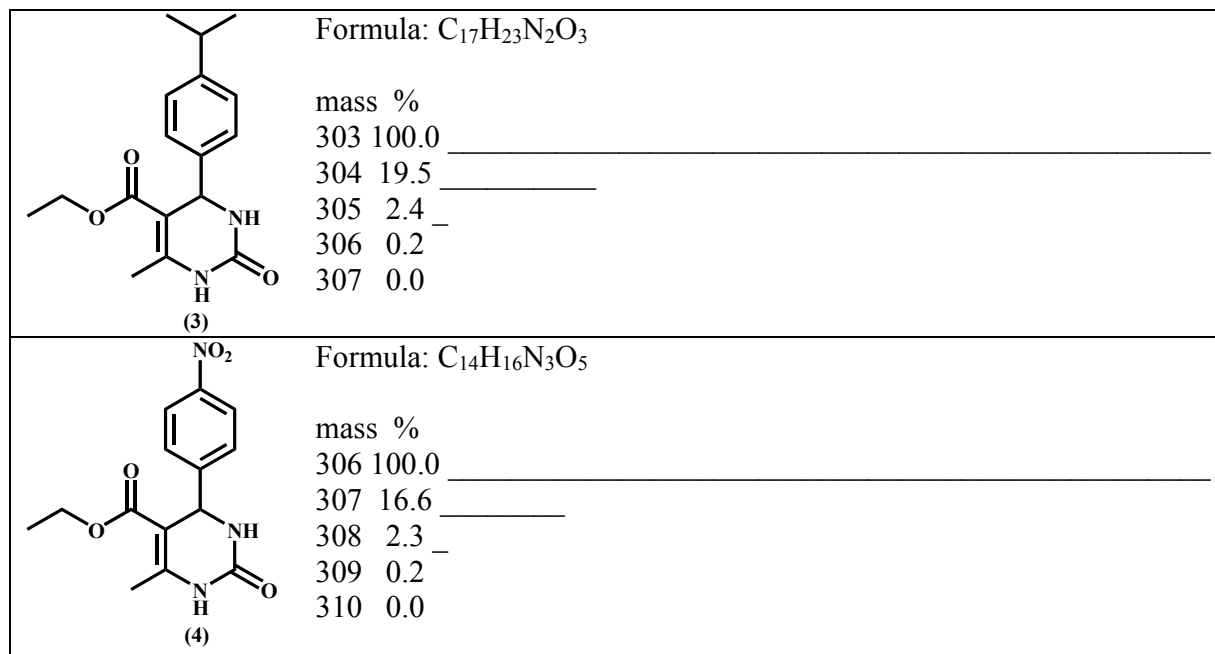

**Figure S3. ESI-MS of 3 (Experimental)**

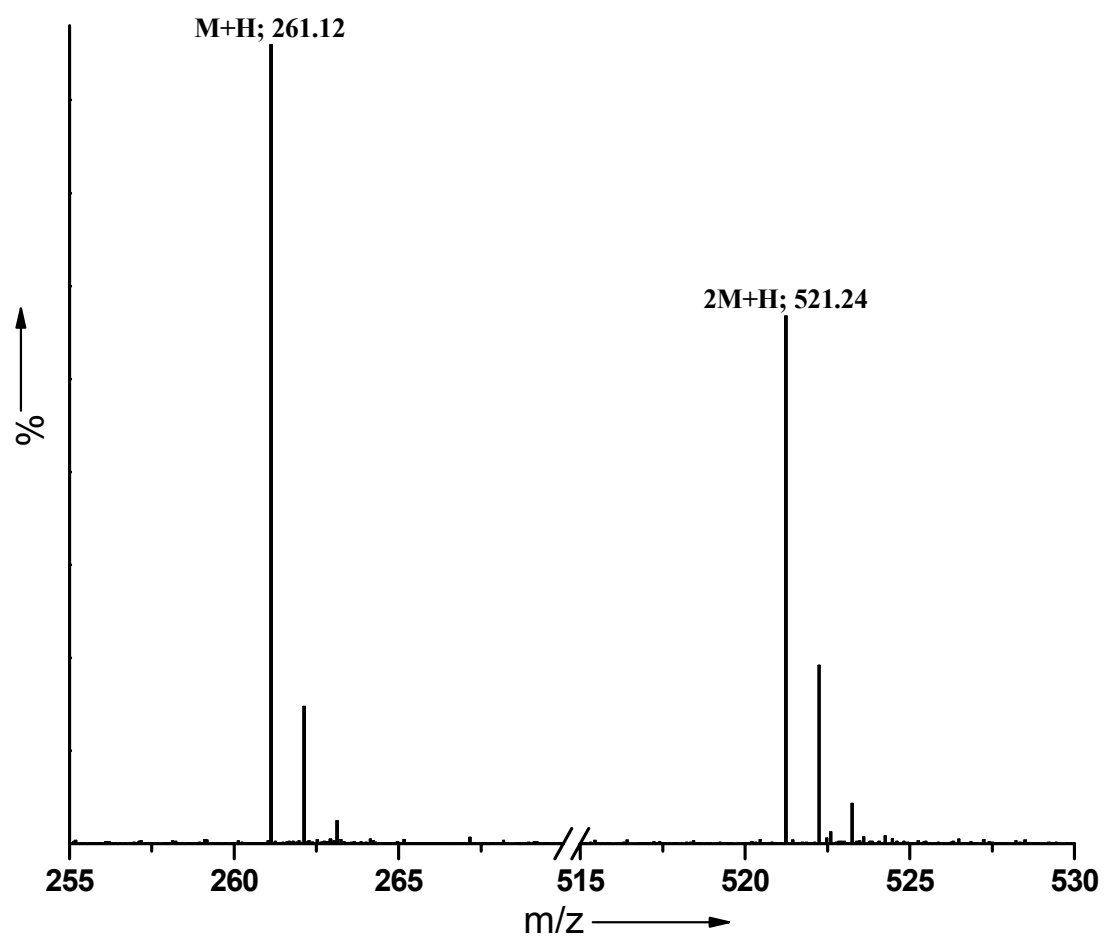

**Figure S4.** ESI-MS of **4** (Experimental)

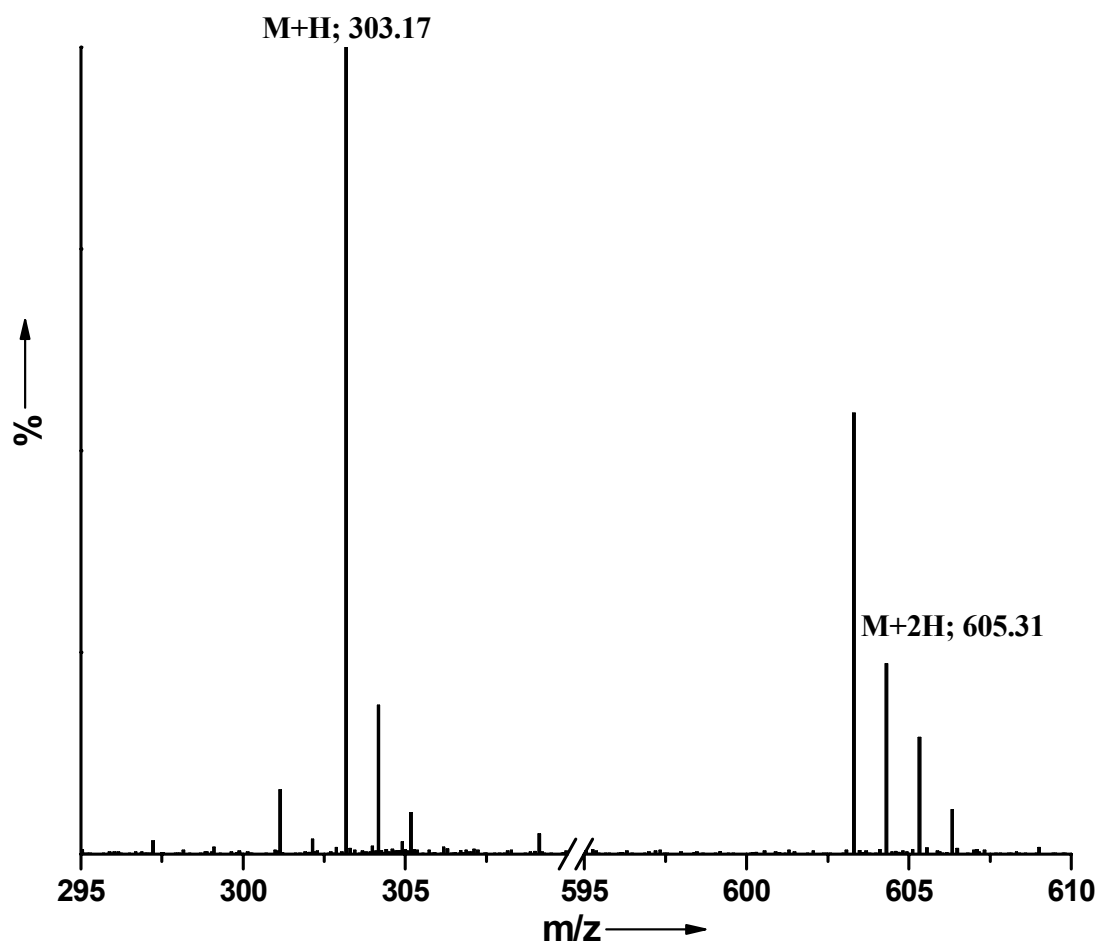

Figure S5. ESI-MS of **5** (Experimental)

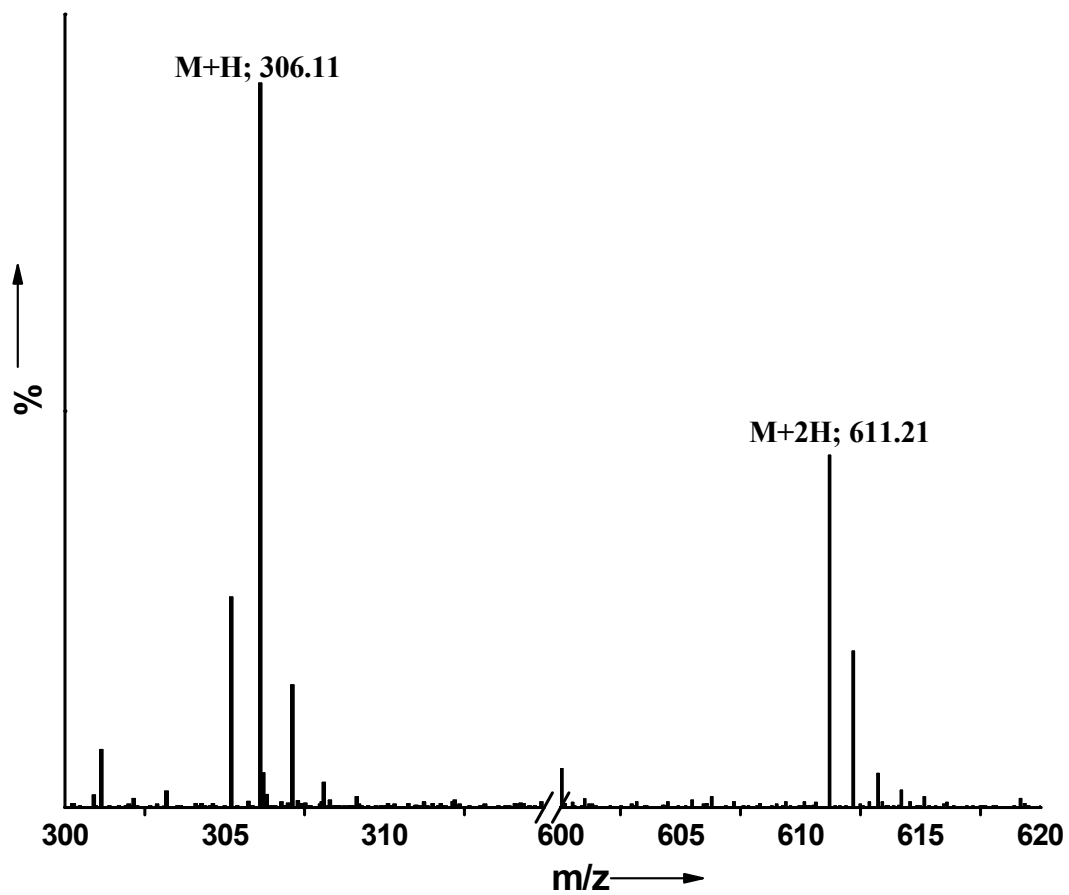

**Figure S6.**  $^1\text{H}$  NMR of **3**

PS798\_1H-5-jd4  
 PS\_798\_1H

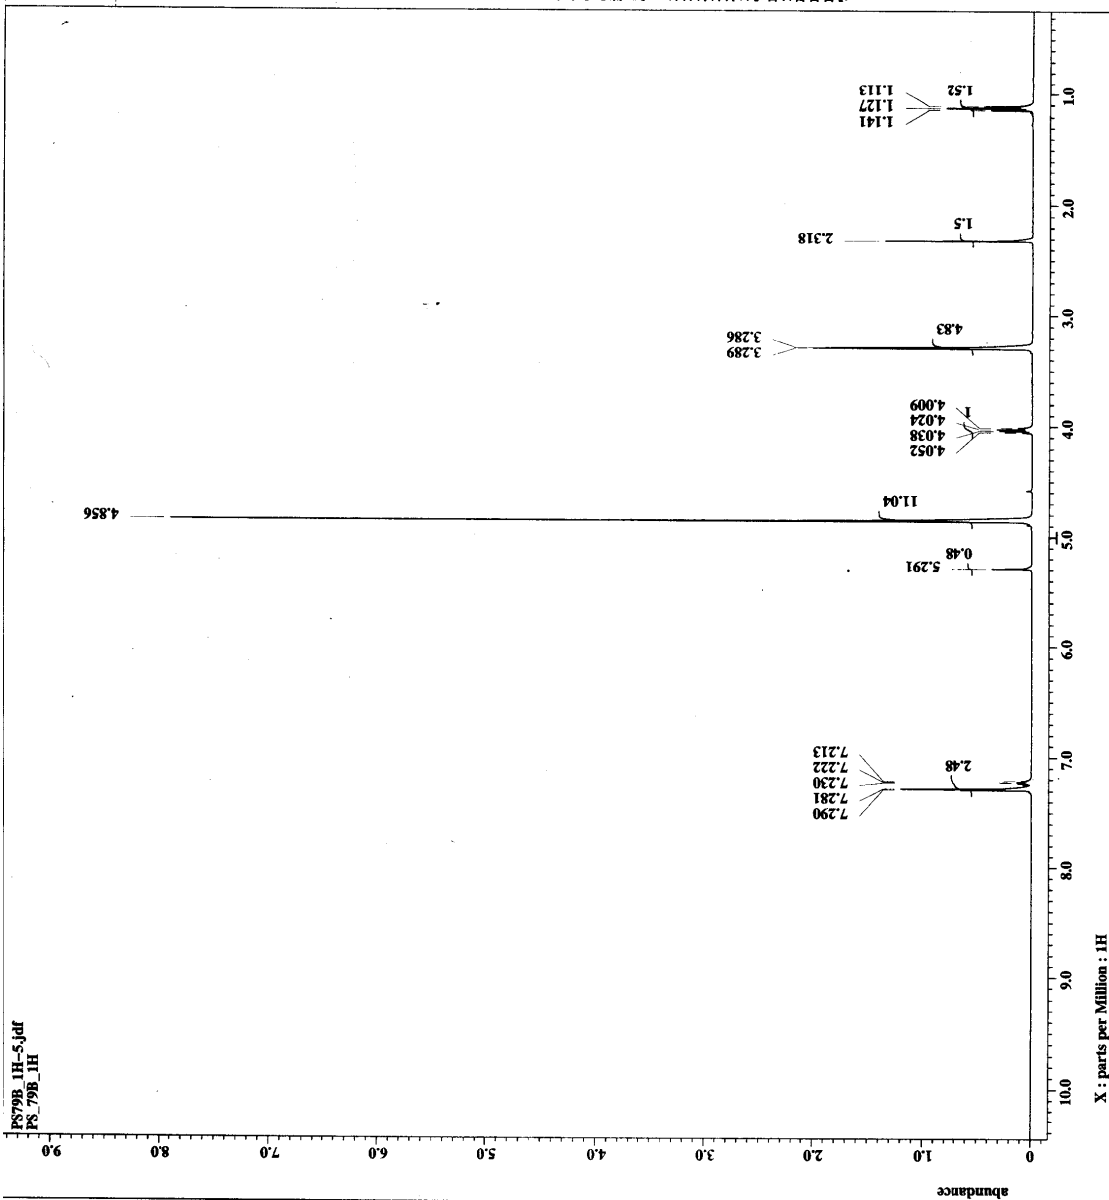

**AJEOL**

```

Filename = PS798_1H-5-jd4
Author = K.Ahmed
Experiment = single_pulse.ex2
Sample_id = PS798_1H
Solvent = METHANOL-D3
Creation_time = 5-FEB-2008 13:54:47
Revision_time = 5-FEB-2008 13:57:56
Current_time = 5-FEB-2008 13:58:02

Comment =
Data_format = PS_798_1H
ID_COMPLEX = 1D_COMPLEX
Diam_size = 26214
Diam_title = 1H
Diam_units = [ppm]
Dimensions = X
Site = ECX 500
Spectrometer = DELTA2_MMR

Field_strength = 11.74737579 [T] (500 [MHZ])
X_acc_duration = 3.49175808 [s]
X_domain = 1H
X_freq = 500.15991521 [MHz]
X_offset = 5.0 [ppm]
X_points = 32768
X_resolution = 1
X_prescans = 0.28638868 [Hz]
X_sweep = 9.38438438 [kHz]
X_domain = 1H
Irr_domain = 500.15991521 [MHz]
Irr_offset = 5.0 [ppm]
Irr_domain = 1H
Tri_domain = 500.15991521 [MHz]
Tri_freq = 500.15991521 [MHz]
Tri_offset = 5.0 [ppm]
Clipped = FALSE
Mod_return = 1
Scans = 16
Total_scans = 16

X_90_width = 12.25 [us]
X_acq_time = 3.49175808 [s]
X_angle = 45 [deg]
X_atn = 3.99 [dB]
X_pulse = 6.125 [us]
Irr_mode = Off
Tri_mode = Off
Date_preset = FALSE
Data_format = 1D_COMPLEX
Acq_gain = 50
Relaxation_delay = 5 [s]
Repetition_time = 8.49175808 [s]
Temp_set = 22 [dC]
    
```

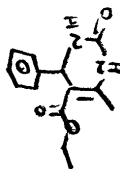

X : parts per Million : 1H



**Figure S7.**  $^1\text{H}$  NMR of **4**

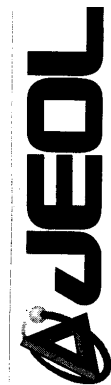

```

File Name      = PS79A_IH-4.jdf
Subst         =
Experiment     =
Acquisition   = PS79A_IH
Sample ID     = METRAMOL-D3
Solvent       = METRAMOL-D3
Creation time  = 5-FEB-2008 12:32:05
Revision time  = 5-FEB-2008 12:34:12
Current time   = 5-FEB-2008 12:34:30

Comment       = PS_79A_IH
Data format   = ID COMPLEX
Dia title     = 78214
Dia units     = ppm
Dimensions    = X
Site          = ECK 500
Spectrometer  = DELTA2_NMR

Field strength = 11.7473579 [T] (500 [MH
X_acq duration = 3.49175808 [s]
X_chan         = 1H
X_freq        = 500.15991521 [MHz]
X_offset      = 5.0 [ppm]
X_points      = 32768
X_prescans    = 1
X_resolution  = 0.28638868 [Hz]
X_sweep       = 1H
Irr_domain    = 9.38438438 [MHz]
Irr_freq      = 500.15991521 [MHz]
Irr_offset    = 1.0 [ppm]
Tri_chan      = 1H
Tri_freq      = 500.15991521 [MHz]
Tri_offset    = 5.0 [ppm]
Clipped       = FALSE
Mod_return    = 1
Scans         = 16
Total_scans   = 16

X_90_width    = 12.25 [us]
X_acq time    = 3.49175808 [s]
X_angle       = 45 [deg]
X_atn         = 3.99 [dB]
X_pulse       = 6.125 [us]
Irr_mode      = Off
Tri_mode      = Off
Dante_preset  = FALSE
Initial_wait  = 1 [s]
Relaxation    = 5 [s]
Relaxation_delay = 5 [s]
Repetition_time = 8.49175808 [s]
Temp_set      = 20.1 [dC]
    
```

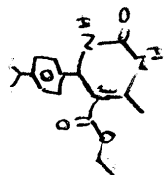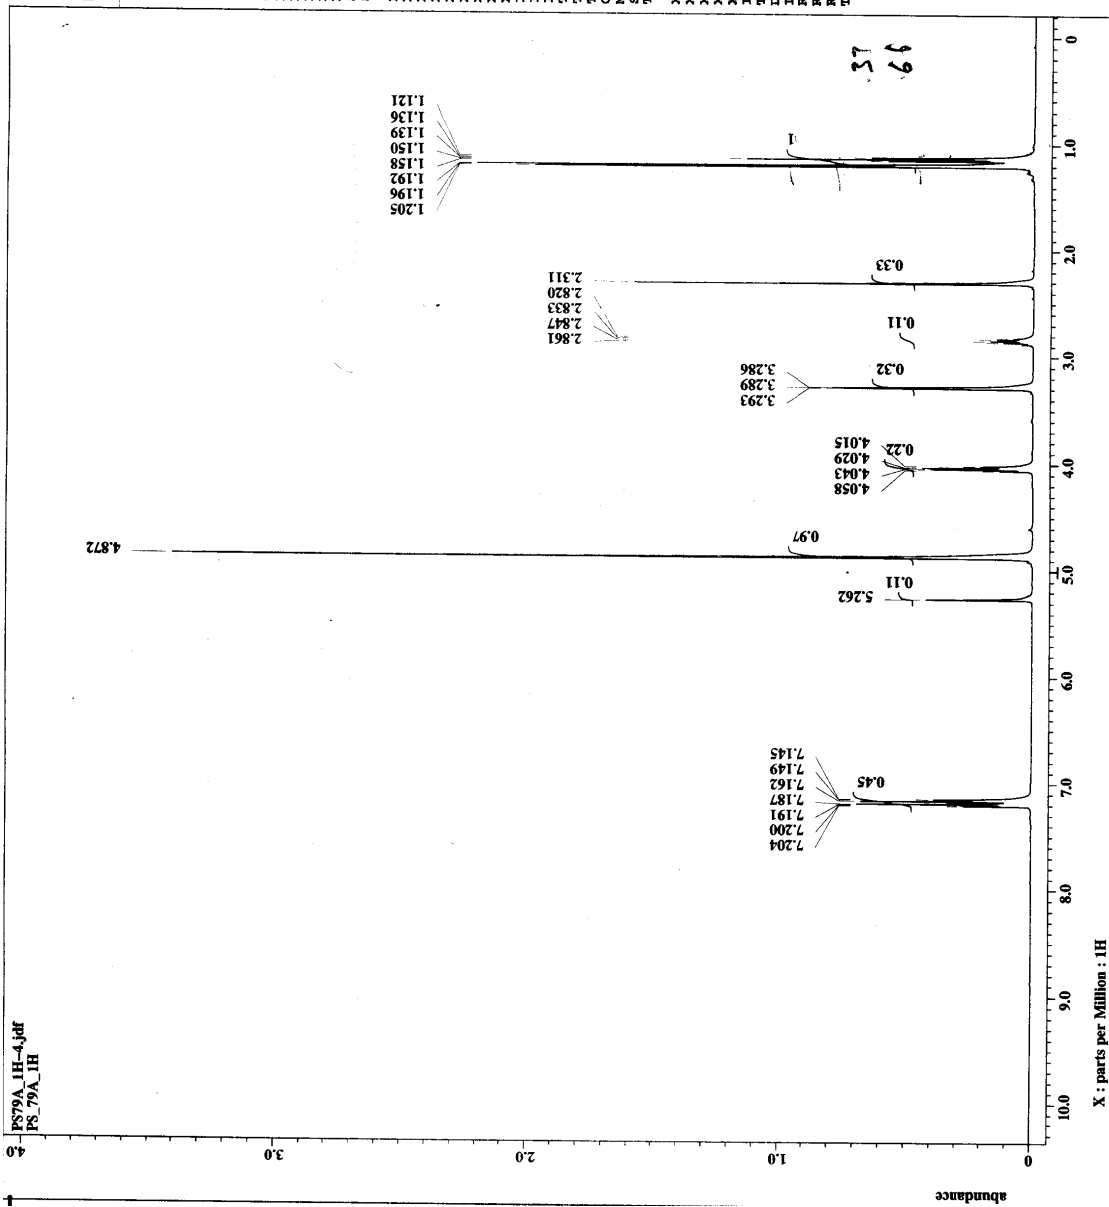

Figure S8. <sup>1</sup>H NMR of 5

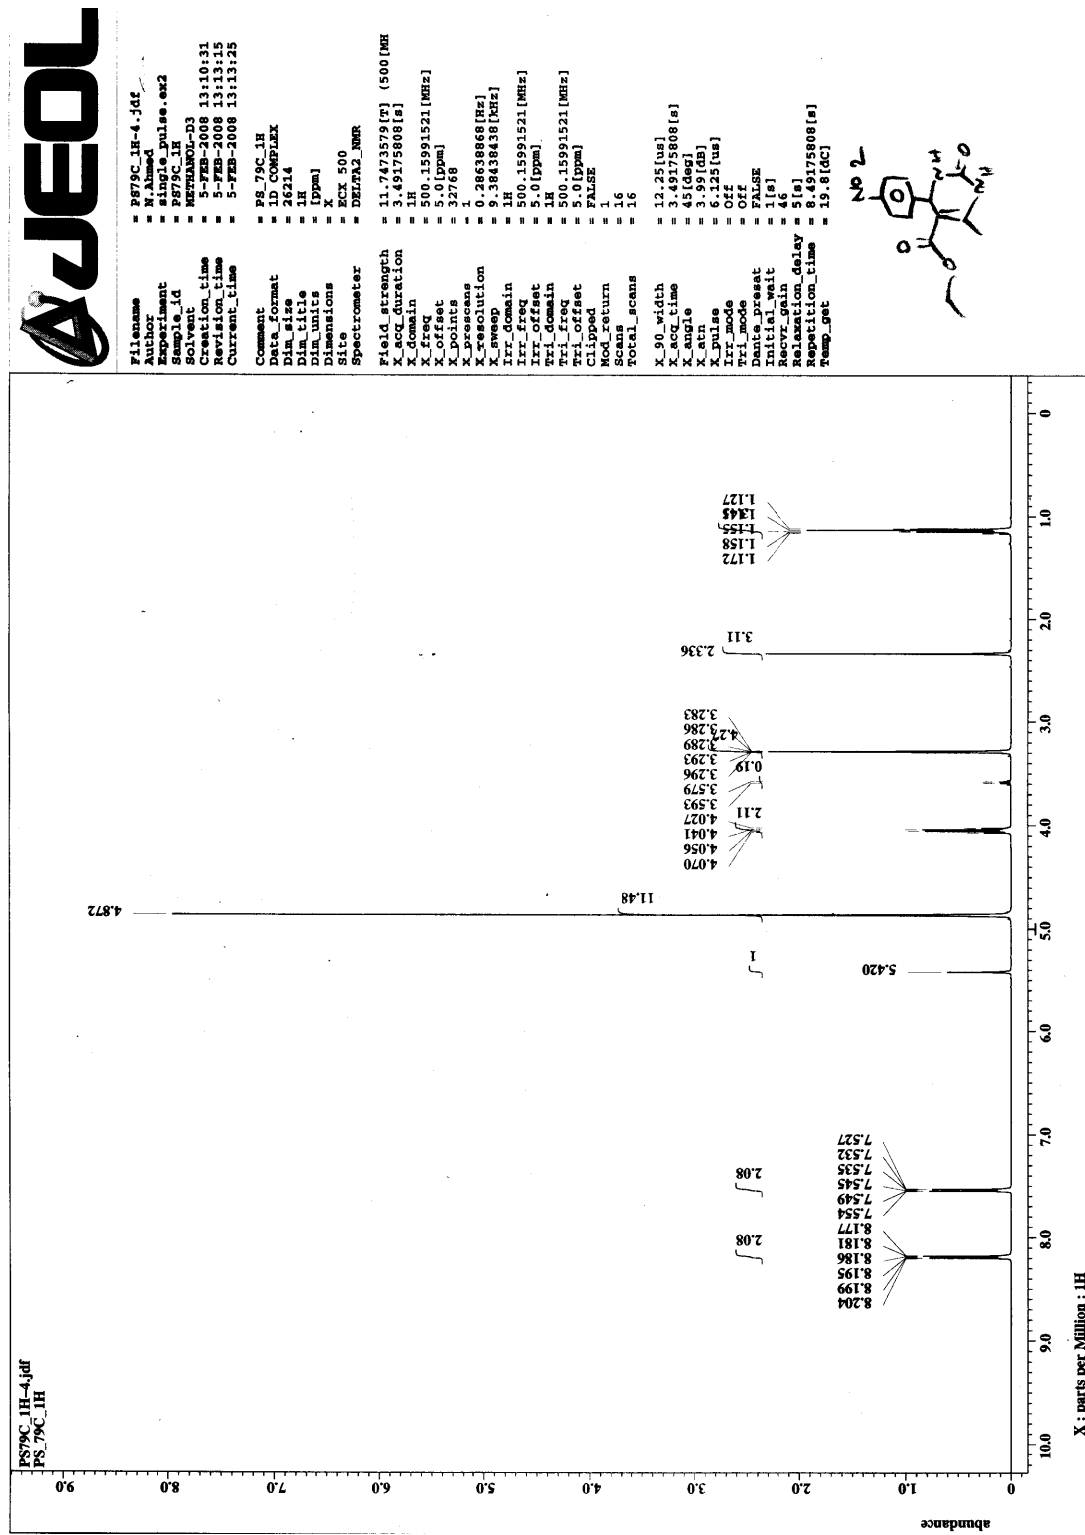

Figure S9. Infrared spectrum of **2** recorded as a KBr pellet

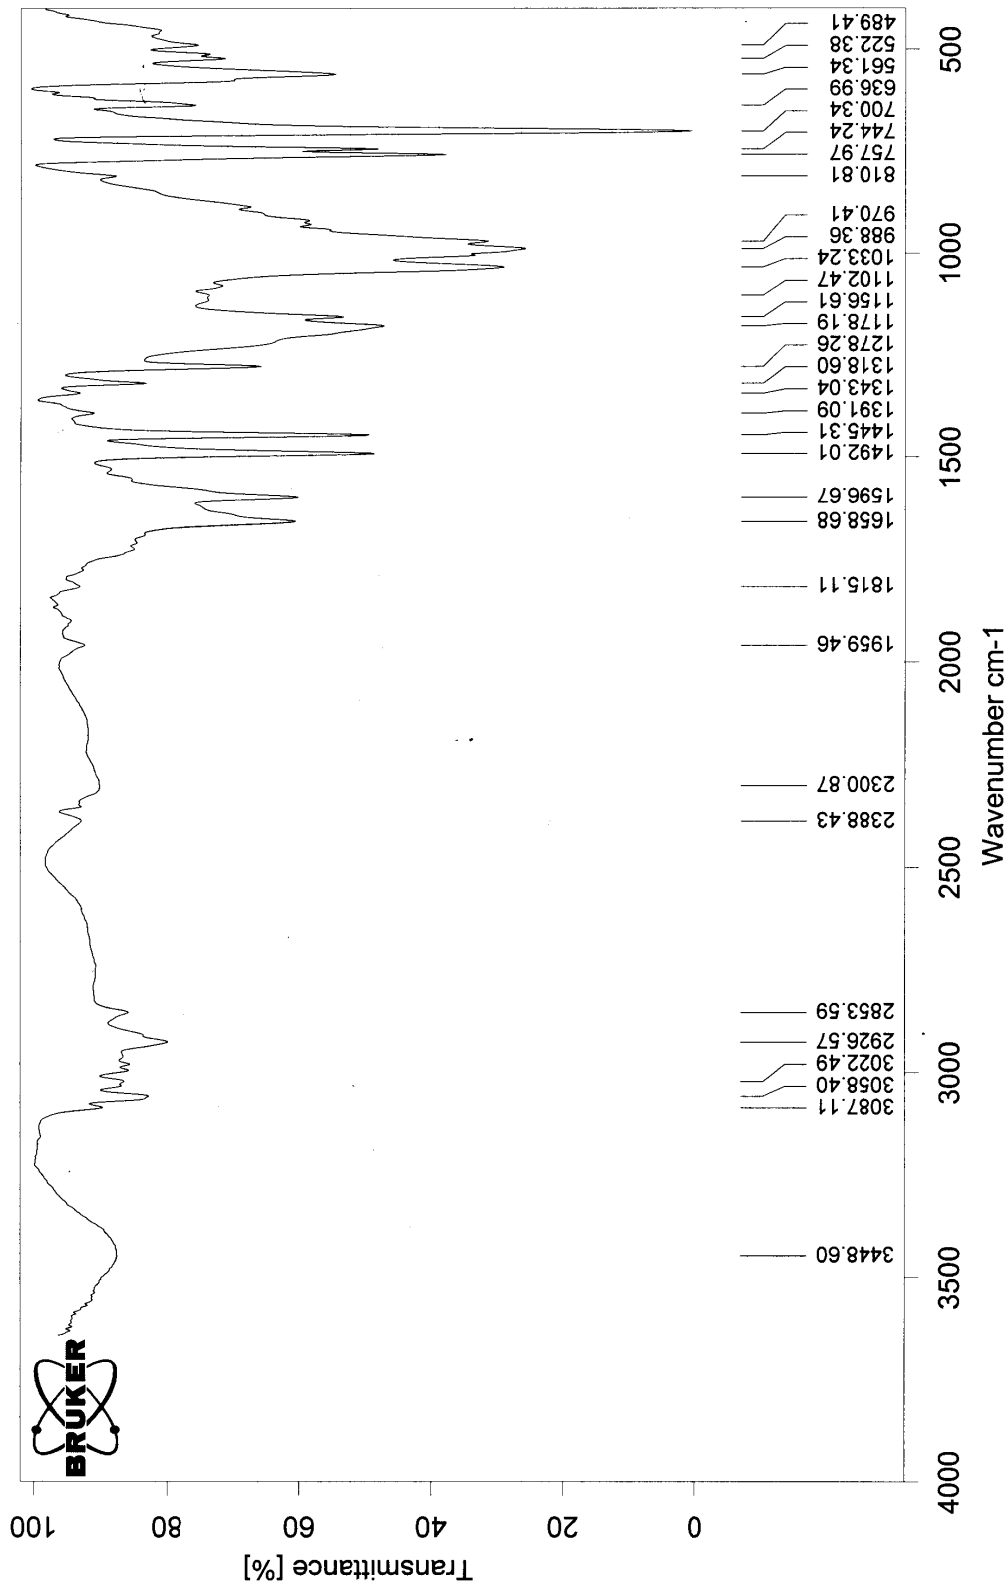

Supplement: b807801g.pdf [file b807801g.pdf]
